# Supplementary material for: Pilot Testing of Useful Tools’ Validity for Frailty Assessment in Greece: Translated PRISMA-7 Tool, Modified Fried Criteria and Clinical Frailty Scale
Source: MDPI journal article supplement (doi:10.3390/healthcare12090930), 2024-04-30
Supplement: s1 [file s1]

| ΕΡΩΤΗΣΗ                                                                                                                                                                                                                                                                                                                                                                                                                                                                                                                                                                                                                                           |  | ΑΠΑΝΤΗΣΗ |     |
|---------------------------------------------------------------------------------------------------------------------------------------------------------------------------------------------------------------------------------------------------------------------------------------------------------------------------------------------------------------------------------------------------------------------------------------------------------------------------------------------------------------------------------------------------------------------------------------------------------------------------------------------------|--|----------|-----|
| Είστε 85 ετών ή μεγαλύτερος;                                                                                                                                                                                                                                                                                                                                                                                                                                                                                                                                                                                                                      |  | NAI      | OXI |
| Είστε Άνδρας;                                                                                                                                                                                                                                                                                                                                                                                                                                                                                                                                                                                                                                     |  | NAI      | OXI |
| Σε γενικές γραμμές, έχετε κάποιο πρόβλημα υγείας λόγω του οποίου απαιτείται να περιορίσετε τις δραστηριότητες σας;                                                                                                                                                                                                                                                                                                                                                                                                                                                                                                                                |  | NAI      | OXI |
| Χρειάζεστε τη βοήθεια άλλου ατόμου σε τακτική βάση;                                                                                                                                                                                                                                                                                                                                                                                                                                                                                                                                                                                               |  | NAI      | OXI |
| Σε γενικές γραμμές, έχετε κάποιο πρόβλημα υγείας λόγω του οποίου απαιτείται να μείνετε στο σπίτι;                                                                                                                                                                                                                                                                                                                                                                                                                                                                                                                                                 |  | NAI      | OXI |
| Αν χρειαστείτε βοήθεια, μπορείτε να υπολογίσετε σε κοντινό σας πρόσωπο;                                                                                                                                                                                                                                                                                                                                                                                                                                                                                                                                                                           |  | NAI      | OXI |
| Χρησιμοποιείτε τακτικά μπάστούνι, περιπατητήρα ή αναπηρικό αμαξίδιο για να μετακινείστε;                                                                                                                                                                                                                                                                                                                                                                                                                                                                                                                                                          |  | NAI      | OXI |
| <p>Centre d'expertise en santé de Sherbrooke. CESS©</p> <ul style="list-style-type: none"> <li>• Raïche, M., Hébert, R., Dubois, M.F., Grégoire M, Bolduc J., Bureau C., Veil A. Le repérage des personnes âgées en perte d'autonomie modérée à grave avec le questionnaire PRISMA7 : développement, implantation et utilisation. La Revue de Gériatrie, 2007; 32(3): 209-218.</li> <li>• Raïche M, Hébert R, Dubois M-F. PRISMA-7: A case-finding tool to identify older adults with moderate to severe disabilities. Archives of Gerontology and Geriatrics 2008; 47(1): 9-18.</li> </ul> <p>Για τα Ελληνικά: Σούλης, Γ., Κυριακοπούλου, Ε.</p> |  |          |     |
