# Supplementary figures and images for: Pilot Testing of Useful Tools’ Validity for Frailty Assessment in Greece: Translated PRISMA-7 Tool, Modified Fried Criteria and Clinical Frailty Scale
Source: MDPI journal article supplement (doi:10.3390/healthcare12090930), 2024-04-30

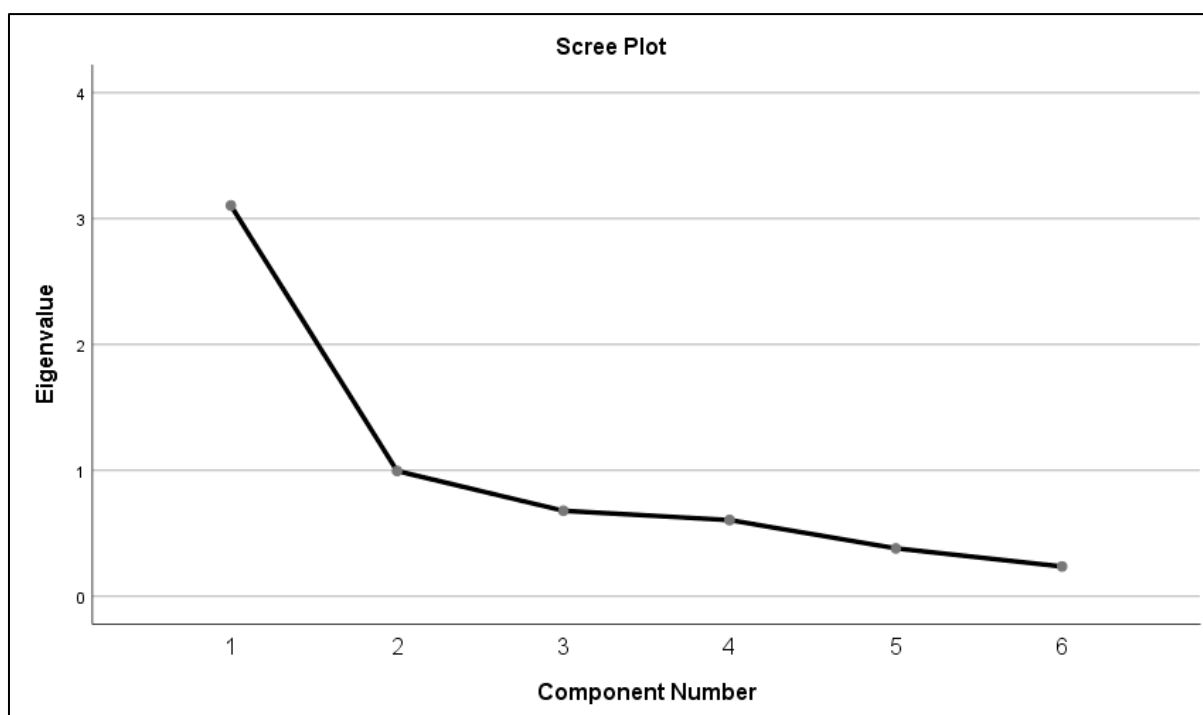

**Figure S2.** Scree plot.

Supplement: s1 [file s1]
